# Supplementary material
Source: Springer Nature journal article supplement (https://www.springermedizin.de/resource/supplementary/13041_2014_287_MOESM3_ESM.pdf/25657910)

**A**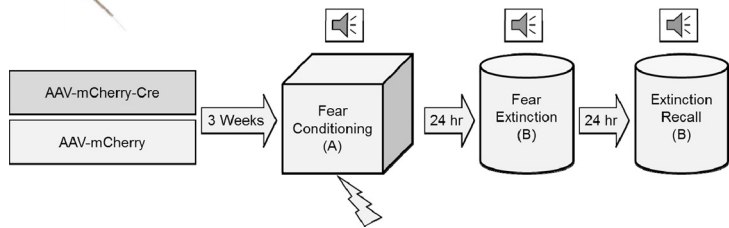**B**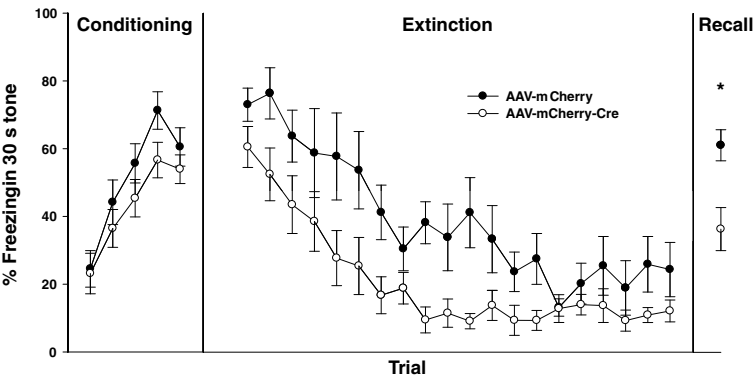**C**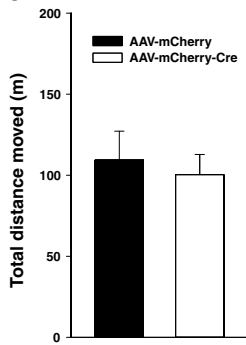**D**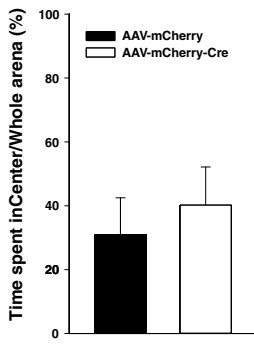

Supplement: MOESM3 [file 25657910]
